# Supplementary material for: Temporal and spatial characteristics of the composition of Hypogymnia physodes (Monk’s-hood lichen) from the Niepołomice Forest in Poland
Source: Research Square preprint supplement (doi:10.21203/rs.3.rs-7719127/v1), 2025-10-31
Supplement: Supplementary file 1 [file d29e71949034c24e0fa65497.pdf]

## Supplementary materials

Table S1. Summary of methods used for elemental quantification in *H. physodes*, presenting the limit of quantification in the mineralized solution (LoQ [mg/L]), the LoQ recalculated for the lichen sample [LoQ [ug/g)], as well as the wavelength, analytical technique used for each element and CRM values (mean [ug/g] followed by SD and recovery [%] in brackets).

| Element | LoQ [mg/L] | LoQ [ug/g] | Wavelength [nm] | Method | CRM                      |
|---------|------------|------------|-----------------|--------|--------------------------|
| Ca      | 24.42      | 298.0      | 422.7           | FAAS   | -                        |
| Cd      | 0.53       | 6.47       | 228.8           | FAAS   | 0.57 ± 0.04<br>(101.79)  |
| Cu      | 0.36       | 4.39       | 324.8           | FAAS   | 6.83 ± 0.63<br>(97.16)   |
| Fe      | 29.91      | 365        | 248.3           | FAAS   | -                        |
| Hg      | 0.20*      | 0.0025     | 253.7           | CV-AAS | 0.47 ± 0.03<br>(97.92)   |
| Pb      | 0.30       | 3.66       | 217.0           | FAAS   | 41.23 ± 2.64<br>(100.81) |
| S       | 0.10       | 1.22       | 400             | UV-VIS | -                        |
| Zn      | 6.06       | 73.93      | 213.9           | FAAS   | 105.28 ± 7.5<br>(104.65) |

\* LoQ for Hg expressed in ng per sample.

Table S2. Influence of factors identified in the final GLM models (Table 3) on the condition of *H. physodes* collected in the Niepolomice Forest.

| Variables | Factor           | Estimate | SE    | t value | p value      |
|-----------|------------------|----------|-------|---------|--------------|
| SOD       | Season (Heating) | -3653    | 1712  | -2.134  | <b>0.042</b> |
| TBARS     | Season (Heating) | -0.073   | 0.017 | -4.312  | <0.001       |
|           | Localization 2   | -0.005   | 0.046 | -0.098  | 0.924        |
|           | Localization 3   | -0.007   | 0.046 | -0.159  | 0.876        |
|           | Localization 4   | 0.024    | 0.046 | 0.509   | 0.619        |
|           | Localization 5   | 0.106    | 0.046 | 2.272   | <b>0.039</b> |
|           | Localization 6   | 0.040    | 0.046 | 0.865   | 0.401        |
|           | Localization 7   | 0.056    | 0.046 | 1.200   | 0.250        |
|           | Localization 8   | 0.164    | 0.046 | 3.526   | <b>0.003</b> |
|           | Localization 9   | 0.036    | 0.046 | 0.771   | 0.453        |
|           | Localization 10  | 0.073    | 0.046 | 1.569   | 0.139        |
|           | Localization 11  | 0.122    | 0.046 | 2.625   | <b>0.020</b> |
|           | Localization 12  | 0.062    | 0.046 | 1.331   | 0.204        |
|           | Localization 13  | 0.059    | 0.046 | 1.266   | 0.226        |
|           | Localization 14  | 0.031    | 0.046 | 0.669   | 0.514        |
|           | Localization 15  | 0.088    | 0.046 | 1.891   | 0.079        |

Bold indicates significant differences (p < 0.05).

11  
12

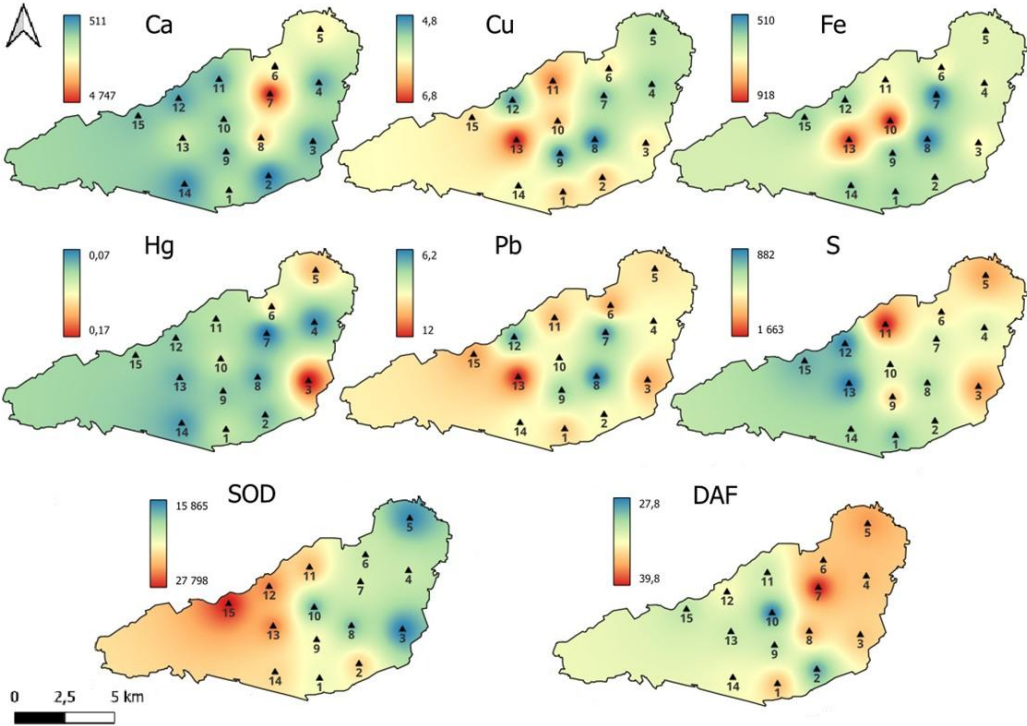

13  
14  
15  
16

Figure S1. Spatial distribution of Ca, Cu, Fe, Hg, Pb, S [ $\mu\text{g/g}$ ], SOD [AU], and dead algae fraction [%] in the Niepolomice Forest.

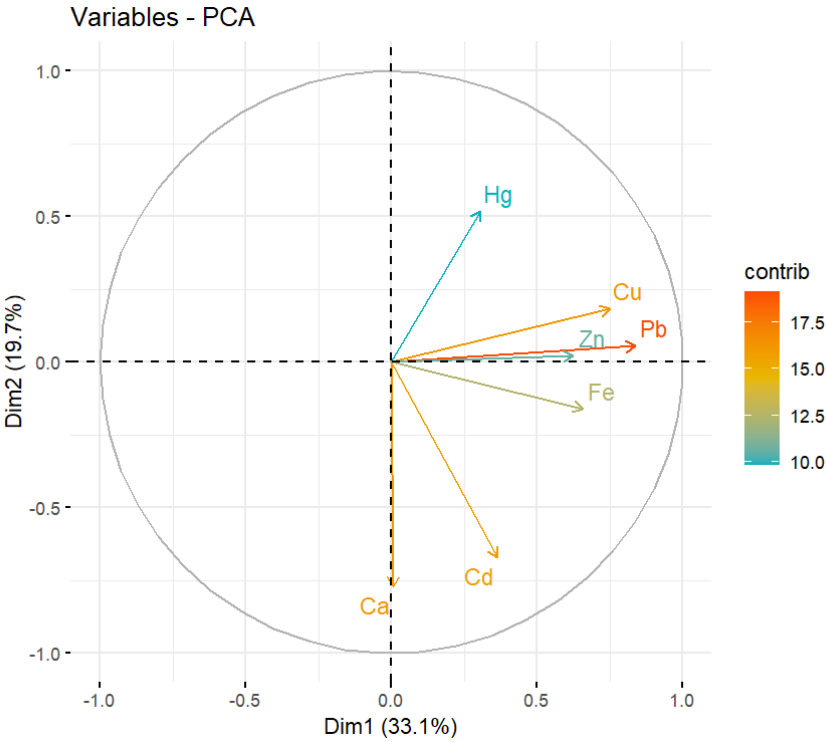

17

18 Figure S2. Principal Component Analysis (PCA) biplot of metals, showing their contribution to the first two  
 19 principal components. Coordinates of the first component (Dim 1) were used as a proxy for metal burden in the  
 20 GLM models.

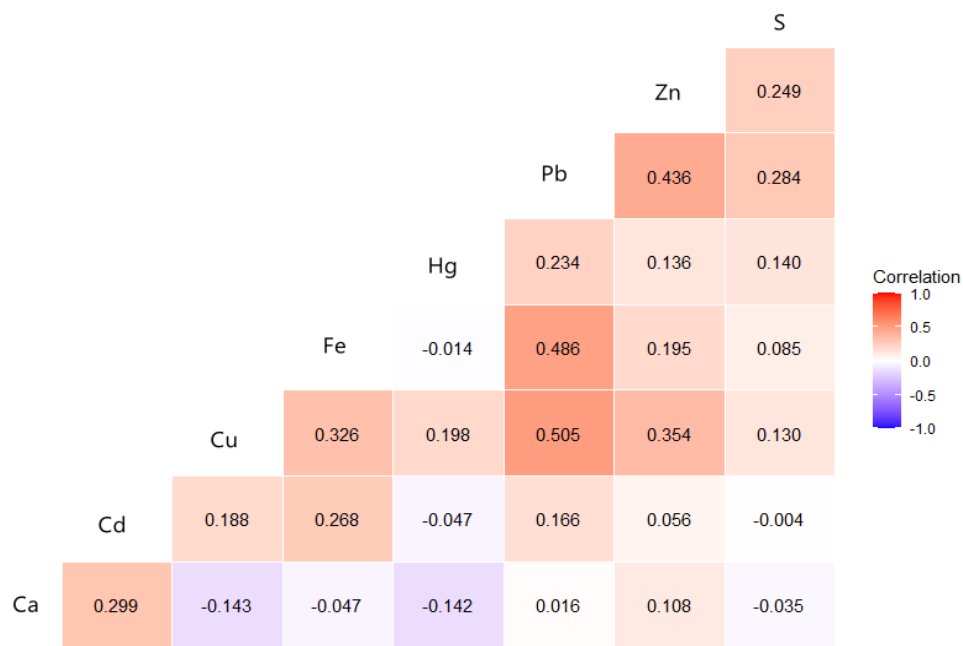

21  
 22 Figure S3. Correlation matrix heatmap presenting Pearson's r coefficients for the relationships between measured  
 23 elements in *H. physodes*.
